# Supplementary material for: Lenvatinib for effectively treating antiangiogenic drug-resistant nasopharyngeal carcinoma
Source: PubMed Central journal article supplement (PMC9391381; doi:10.1038/s41419-022-05171-3), 2022-08-19
Supplement: 41419_2022_5171_MOESM1_ESM.pdf [file 41419_2022_5171_MOESM1_ESM.pdf]

1 Fudan University, Shanghai 200032, P.R. China. Tel: (+86)-21-5423 7311, E-mail:  
2 yunlongyang@fudan.edu.cn

3

4 **Running title:** Lenvatinib overcomes NPC antiangiogenic drug resistance

5

6

1  
2

## Supplemental Figure Legends

Fig.S1

A

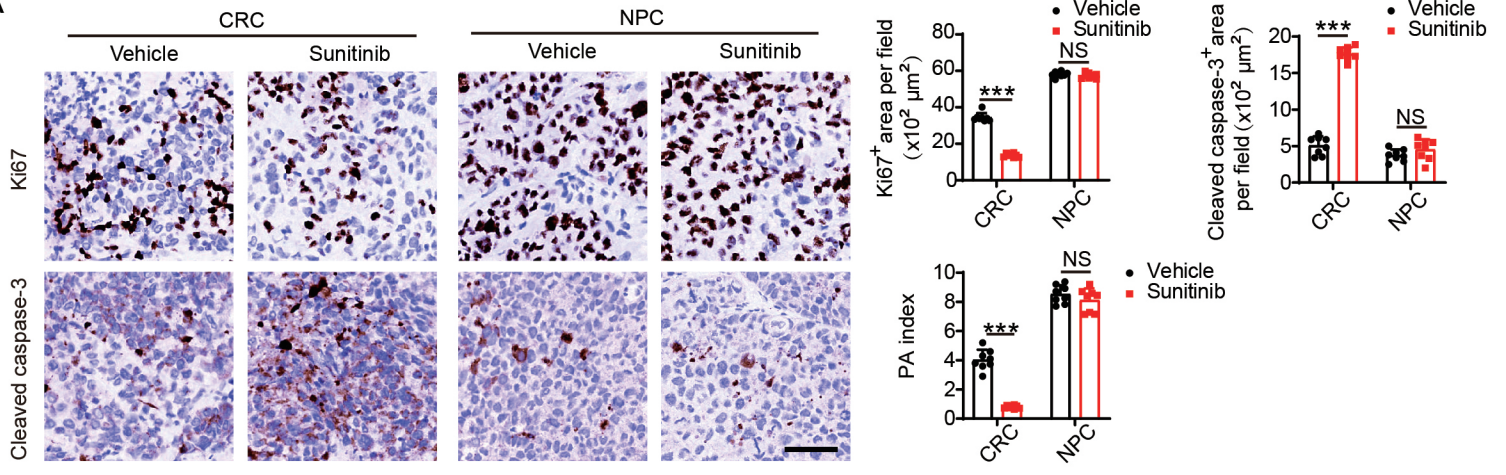

B

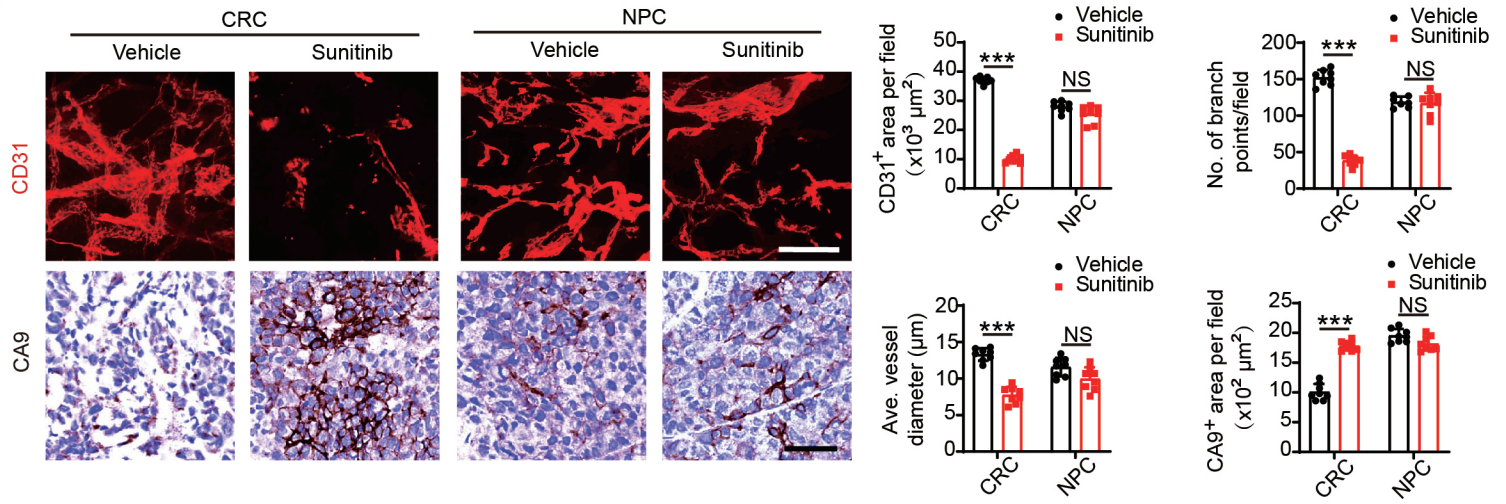

1 **Figure S1. Tumor and vasculature responses to sunitinib in CRC and NPC.**

2 (A) Representative micrographs of Ki67<sup>+</sup> proliferative cells and cleaved caspase-3<sup>+</sup>  
3 apoptotic cells in vehicle- or sunitinib-treated CRC and NPC tumors. Scale bar=50 μm.

4 Quantification of Ki67<sup>+</sup>, cleaved caspase-3<sup>+</sup> signals, and PA index in vehicle- or  
5 sunitinib-treated CRC and NPC tumors (n=8 random fields per group). (B)

6 Representative micrographs of CD31<sup>+</sup> microvessels and CA9<sup>+</sup> hypoxic areas in vehicle-  
7 or sunitinib-treated CRC and NPC tumors. Scale bar in upper panel=100 μm, scale bar

8 in lower panel=50 μm. Quantification of CD31<sup>+</sup> tumor vessel parameters and CA9<sup>+</sup>  
9 signals in vehicle- or sunitinib-treated CRC and NPC tumors (n=8 random fields per

10 group). \*\*\*p<0.001. NS=not significant. Data presented as mean±SD.

11

12

Fig. S2

A

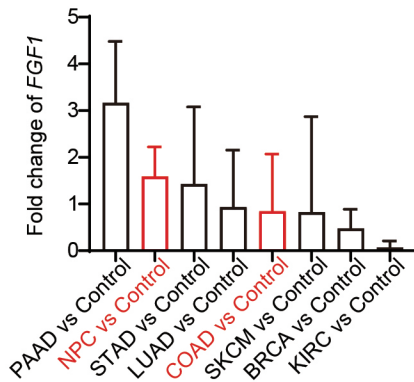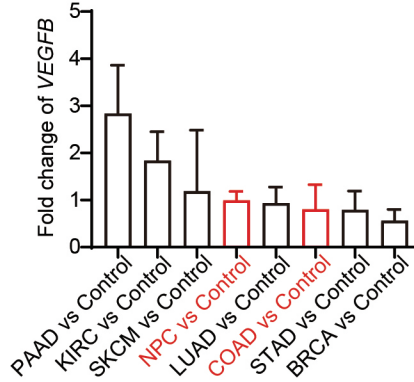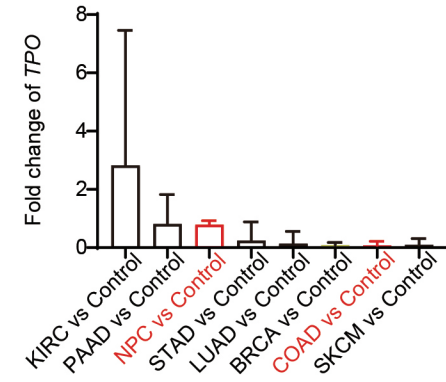

1 **Figure S2. Expression levels of angiogenic factors in various types of cancer.**

2 (A) Transcriptomic expression levels of angiogenic factors, including *FGF1*, *VEGFB*,  
3 and *TPO* in human KIRC tissues, COAD tissues, NPC tissues, STAD tissues, BRCA  
4 tissues, SKCM tissues, and their adjacent healthy tissues. KIRC, kidney renal clear cell  
5 carcinoma; COAD, colon adenocarcinoma; STAD, stomach adenocarcinoma; PAAD,  
6 pancreatic adenocarcinoma; LUAD, lung adenocarcinoma; BRCA, breast invasive  
7 carcinoma; SKCM, skin cutaneous melanoma.

8

Fig.S3

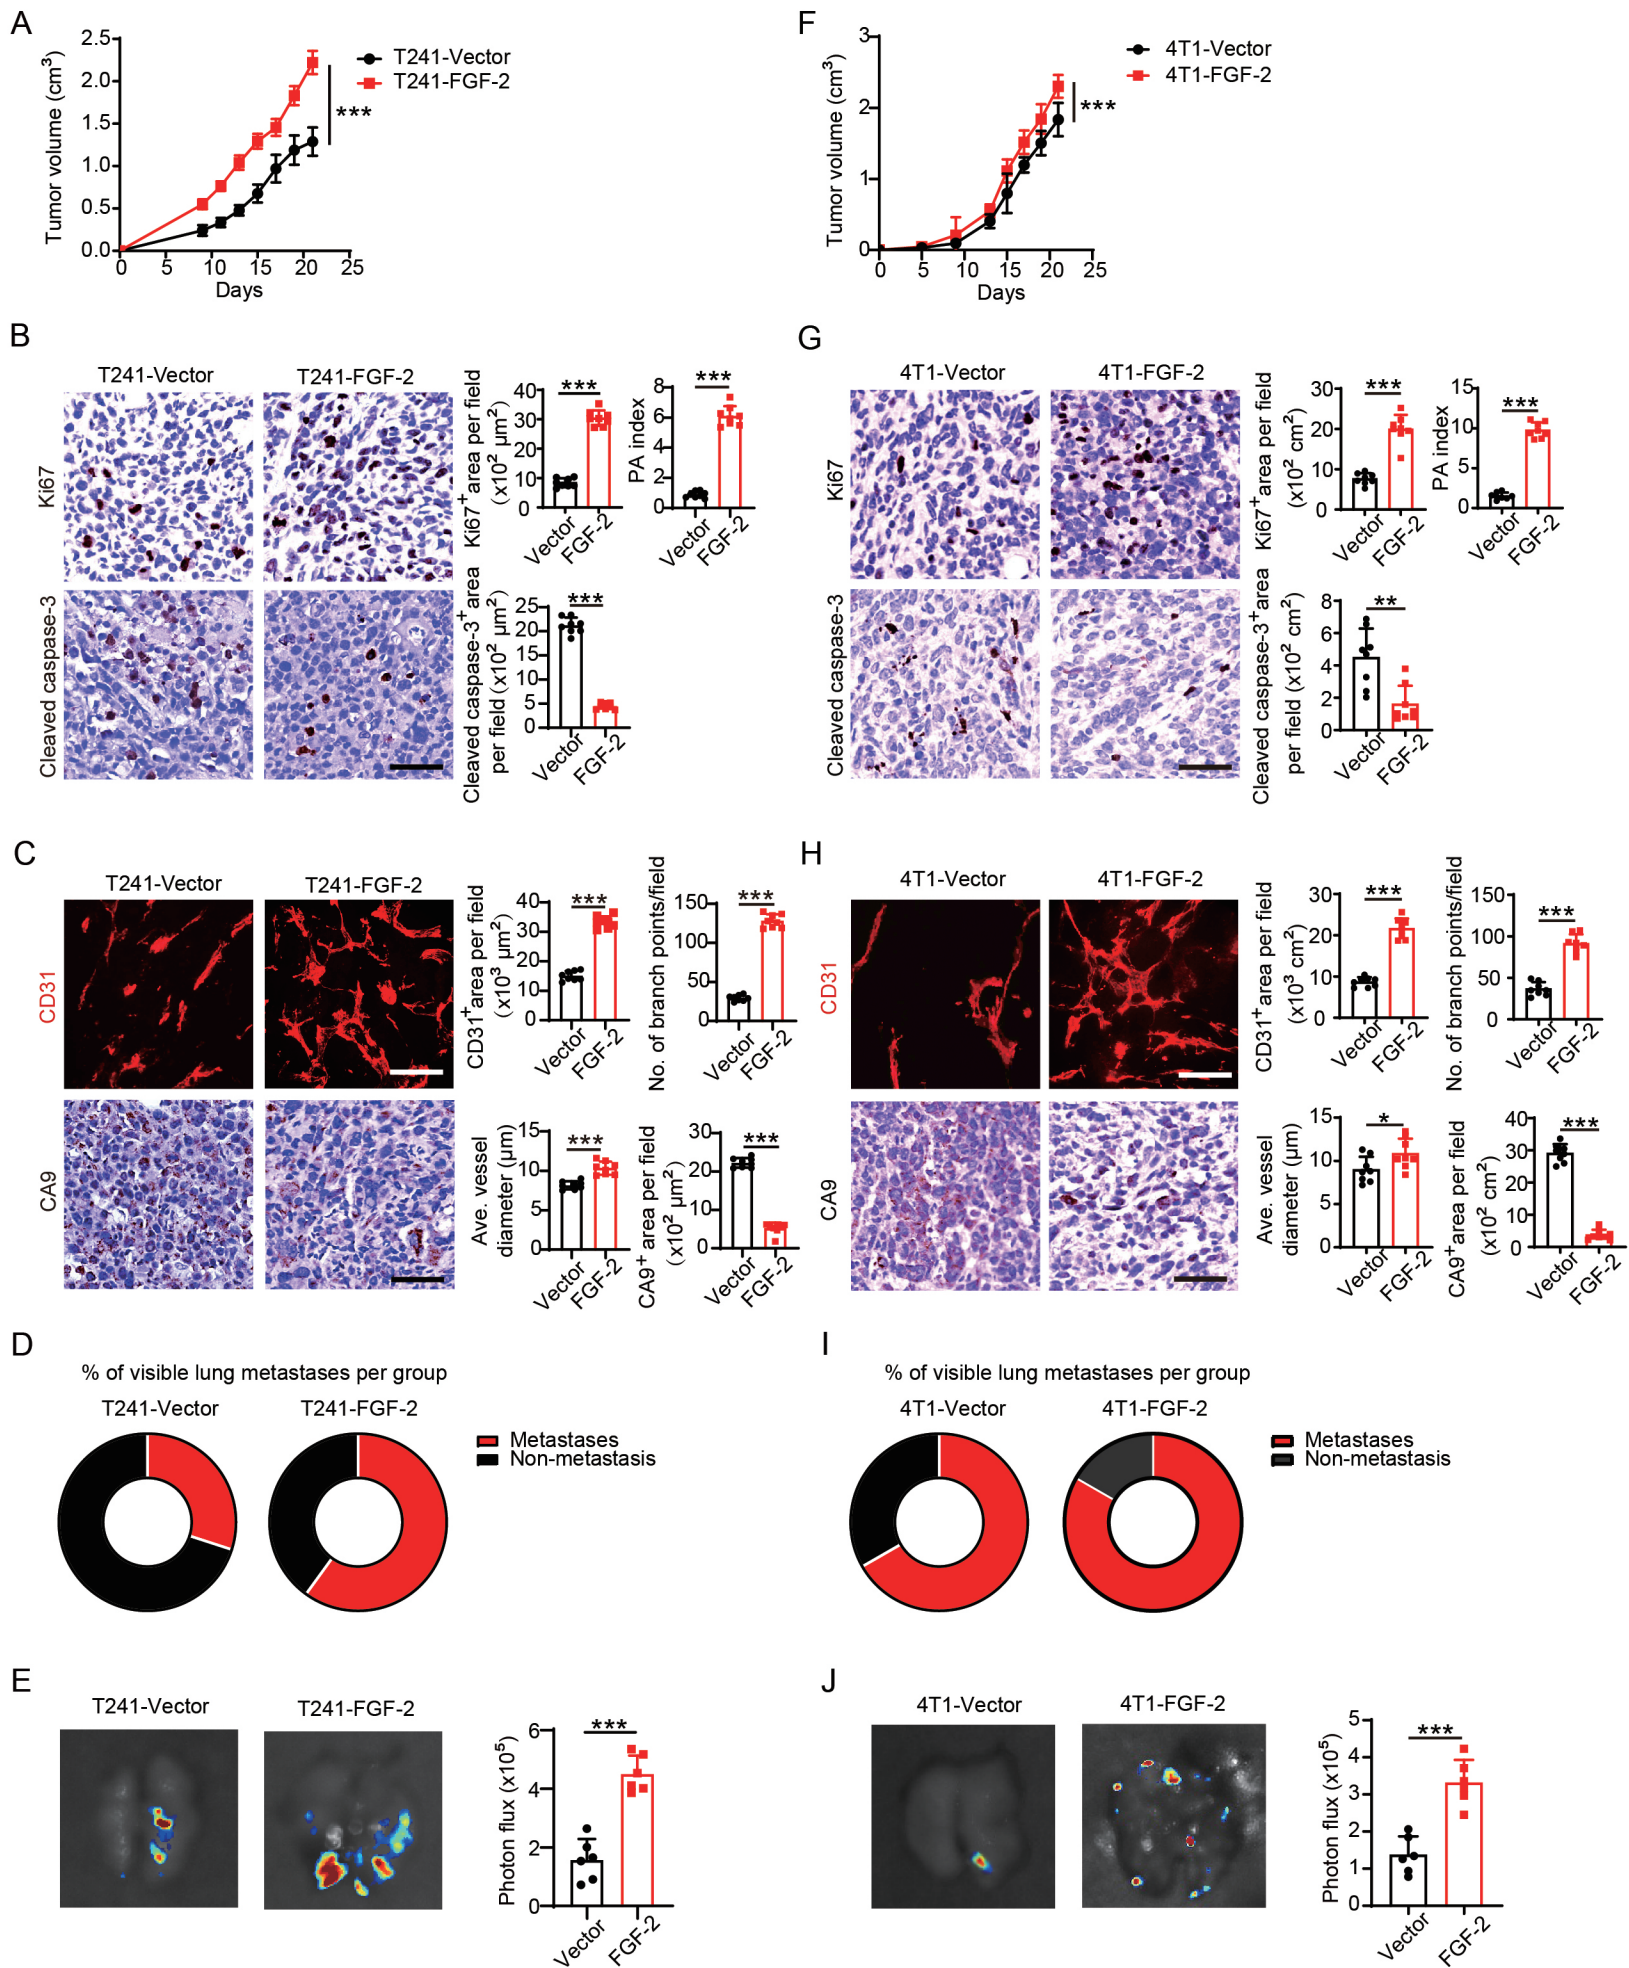



1 **Figure S3. Tumor cell-derived FGF-2 promotes angiogenesis and tumor**  
2 **metastasis in mouse models.**

3 (A and F) Tumor growth of vector- or FGF-2-transfected T241 or 4T1 tumors. (B and  
4 G) Representative micrographs of Ki67<sup>+</sup> proliferative cells and cleaved caspase-3<sup>+</sup>  
5 apoptotic cells in T241 or 4T1 tumors. Scale bar=50  $\mu$ m. Quantification of Ki67<sup>+</sup>,  
6 cleaved caspase-3<sup>+</sup> signals, and PA index in NPC (n=8 random fields per group). (C  
7 and H) Representative micrographs of CD31<sup>+</sup> microvessels and CA9<sup>+</sup> hypoxic areas in  
8 T241 or 4T1 tumors. Scale bar in upper panel=100  $\mu$ m, scale bar in lower panel=50  $\mu$ m.  
9 Quantification of CD31<sup>+</sup> tumor vessel parameters and CA9<sup>+</sup> signals in T241 or 4T1  
10 tumors. (n=8 random fields per group). (D and I) Quantification of pulmonary  
11 metastasis proportion in T241- or 4T1-bearing mice (n=6 mice per group). (E and J)  
12 Representative graphs of EGFP<sup>+</sup> metastatic signals in the lung. Quantification of photon  
13 flux (n=6 lungs per group). \*p<0.05; \*\*p<0.01; \*\*\*p<0.001. NS=not significant. Data  
14 presented as mean $\pm$ SD.

Fig. S4

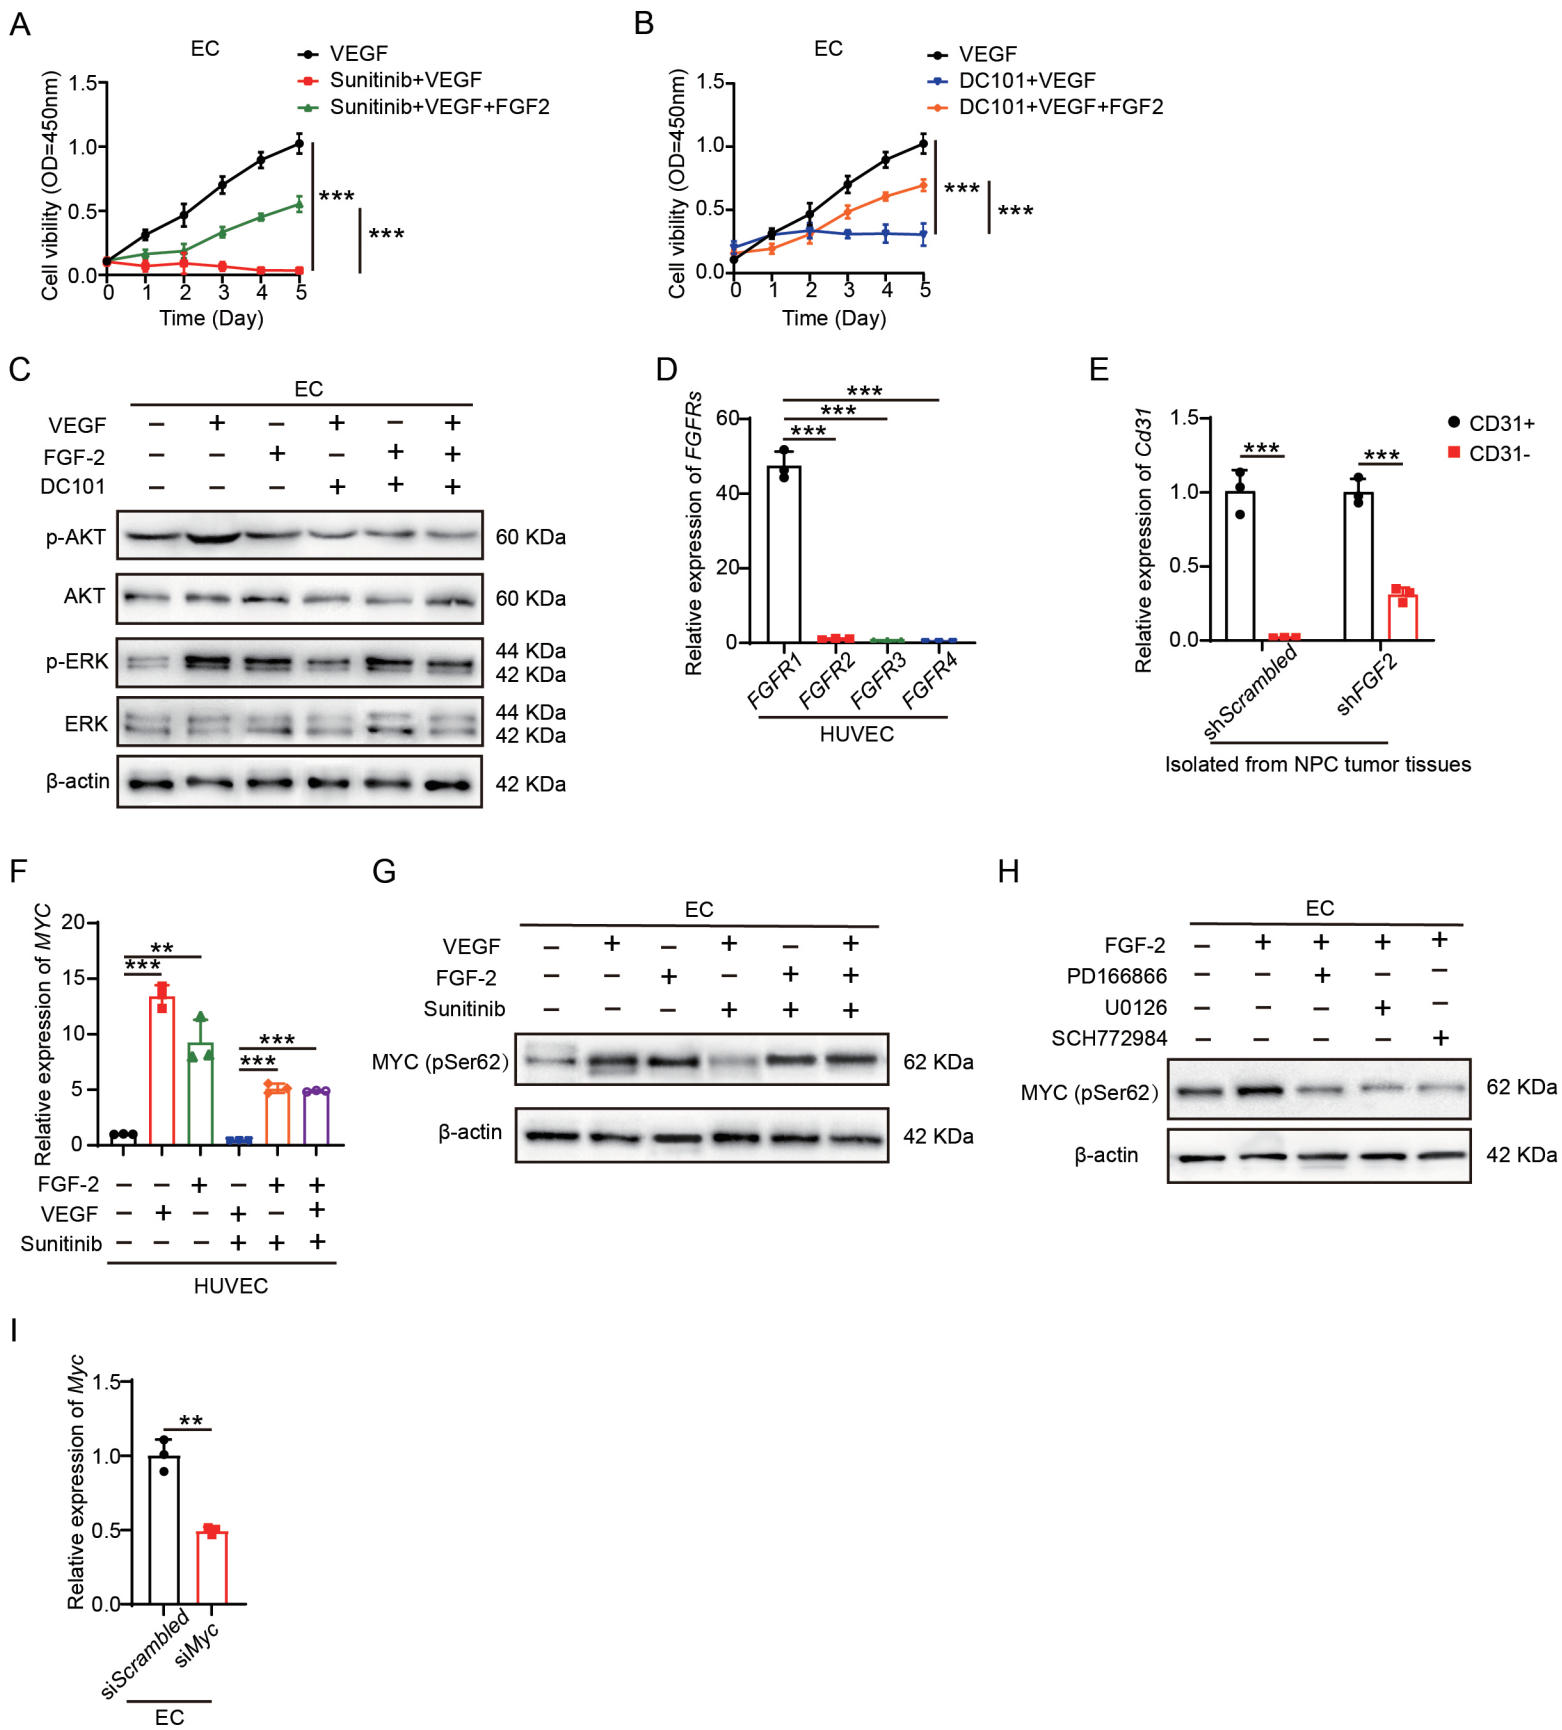

1 **Figure S4. FGF-2 elevates phosphorylation of ERK and MYC in ECs.**

2 (A and B) Cell growth of VEGF-treated ECs receiving with or without AAD or FGF-2  
3 (n=5 samples per group). (C) Vehicle- or VEGF-treated ECs were challenged with or  
4 without VEGFR2 neutralizing antibody or FGF-2. Phosphorylation of AKT and ERK  
5 in ECs was detected.  $\beta$ -actin marks the loading level in each lane (n=3 samples per  
6 group). (D) QPCR quantification of *FGFR1*, *FGFR2*, *FGFR3*, and *FGFR4* mRNA  
7 levels in human ECs (n=3 samples per group). (E) QPCR quantification of *CD31*  
8 mRNA levels in isolated CD31<sup>+</sup> ECs from scramble- or *FGF2* shRNA-transfected NPC  
9 tumor tissues (n=3 samples per group). (F) QPCR quantification of *MYC* mRNA levels  
10 in various groups of human ECs (n=3 samples per group). (G) Vehicle- or VEGF-  
11 treated ECs were treated with or without AAD or FGF-2. MYC phosphorylation in ECs  
12 was detected.  $\beta$ -actin marks the loading level in each lane (n=3 samples per group). (H)  
13 Vehicle- or FGF-2-treated ECs were challenged with or without various inhibitors.  
14 Phosphorylation of MYC in ECs was detected.  $\beta$ -actin marks the loading level in each  
15 lane (n=3 samples per group). (I) QPCR quantification of *Myc* mRNA levels in  
16 scramble- or *Myc* siRNA-transfected ECs (n=3 samples per group). \*\*p<0.01;  
17 \*\*\*p<0.001. NS=not significant. Data presented as mean $\pm$ SD.

18

Fig. S5

A

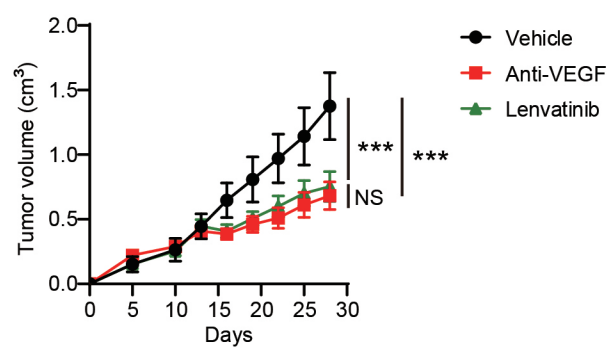

1 **Figure S5. Similar efficacy of anti-VEGF and lenvatinib in CRC xenografts.**  
2 (A) Tumor growth was measured in vehicle-, anti-VEGF-, and lenvatinib-treated CRC  
3 tumors (n=6 samples per group). \*\*\*p<0.001. NS=not significant. Data presented as  
4 mean±SD.  
5

Fig.S6

A

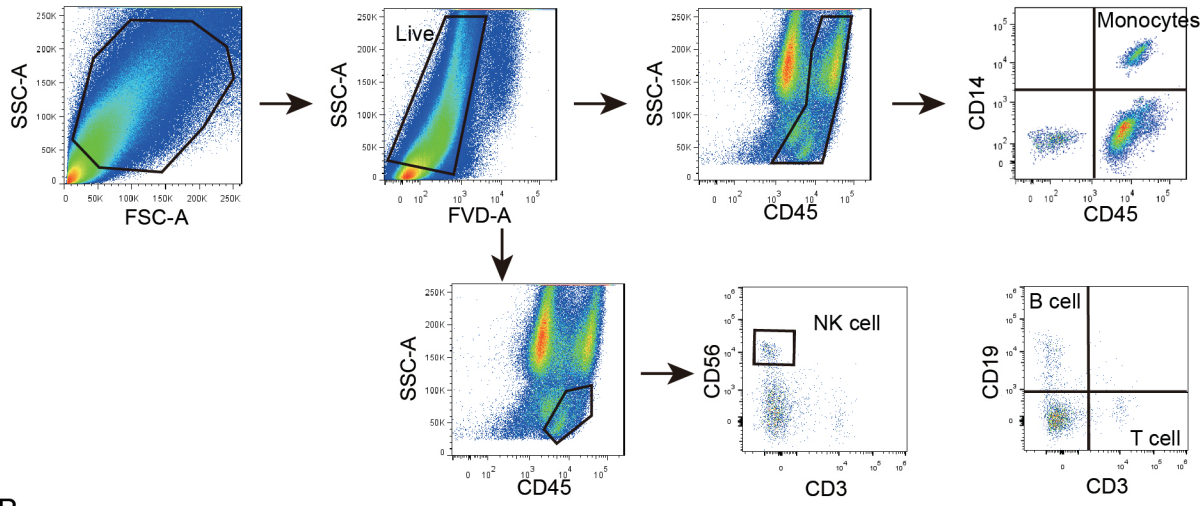

B

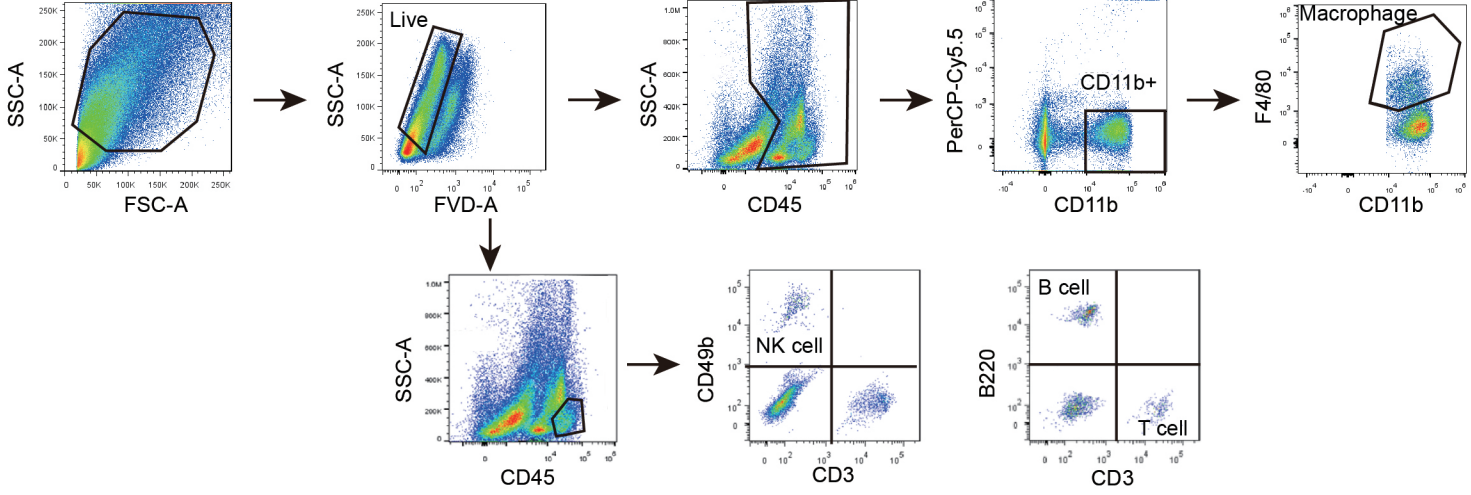

1

2 **Figure S6. Gating strategy for FACS analysis of immune landscape in NPC in**  
3 **humanized NSG mice.**

4 (A) Representative FACS profiles showing gating strategy of hCD45<sup>+</sup> hCD14<sup>+</sup>  
5 population, hCD45<sup>+</sup> hCD19<sup>+</sup> population, hCD45<sup>+</sup> hCD3<sup>+</sup> population, and hCD45<sup>+</sup>  
6 hCD56<sup>+</sup> population in the NPC TME. (B) Representative FACS profiles showing  
7 gating strategy of mCD45<sup>+</sup> mCD11b<sup>+</sup> mF4/80<sup>+</sup> population, mCD45<sup>+</sup> mB220<sup>+</sup>  
8 population, mCD45<sup>+</sup> mCD3<sup>+</sup> population, and mCD45<sup>+</sup> mCD49b<sup>+</sup> population.

9
