# Supplementary material for: Lenvatinib for effectively treating antiangiogenic drug-resistant nasopharyngeal carcinoma
Source: PubMed Central journal article supplement (PMC9391381; doi:10.1038/s41419-022-05171-3), 2022-08-19

Fig.4C

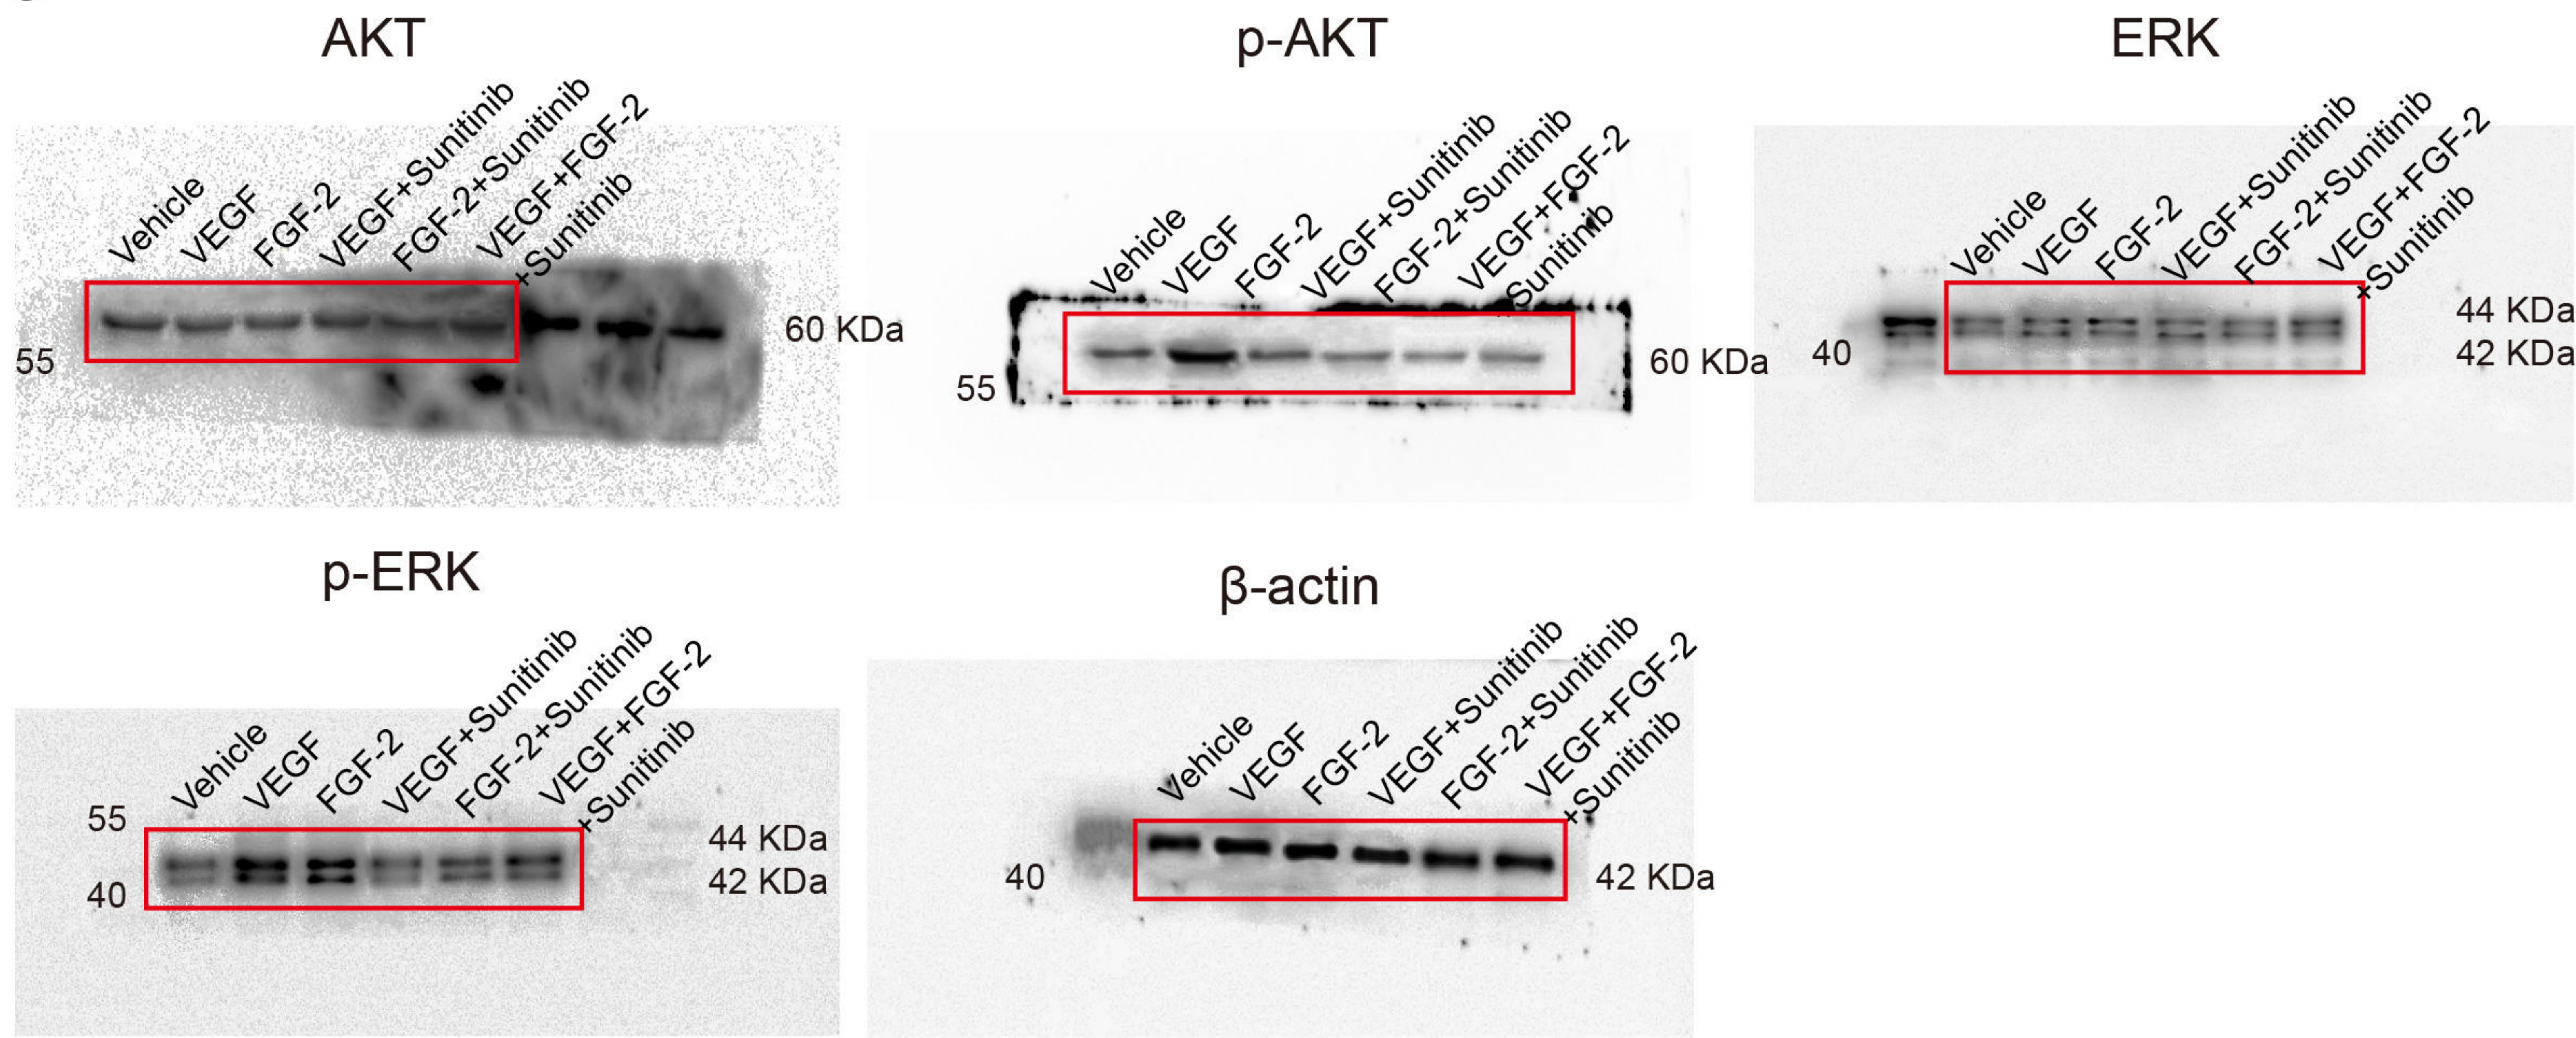

Fig.4E

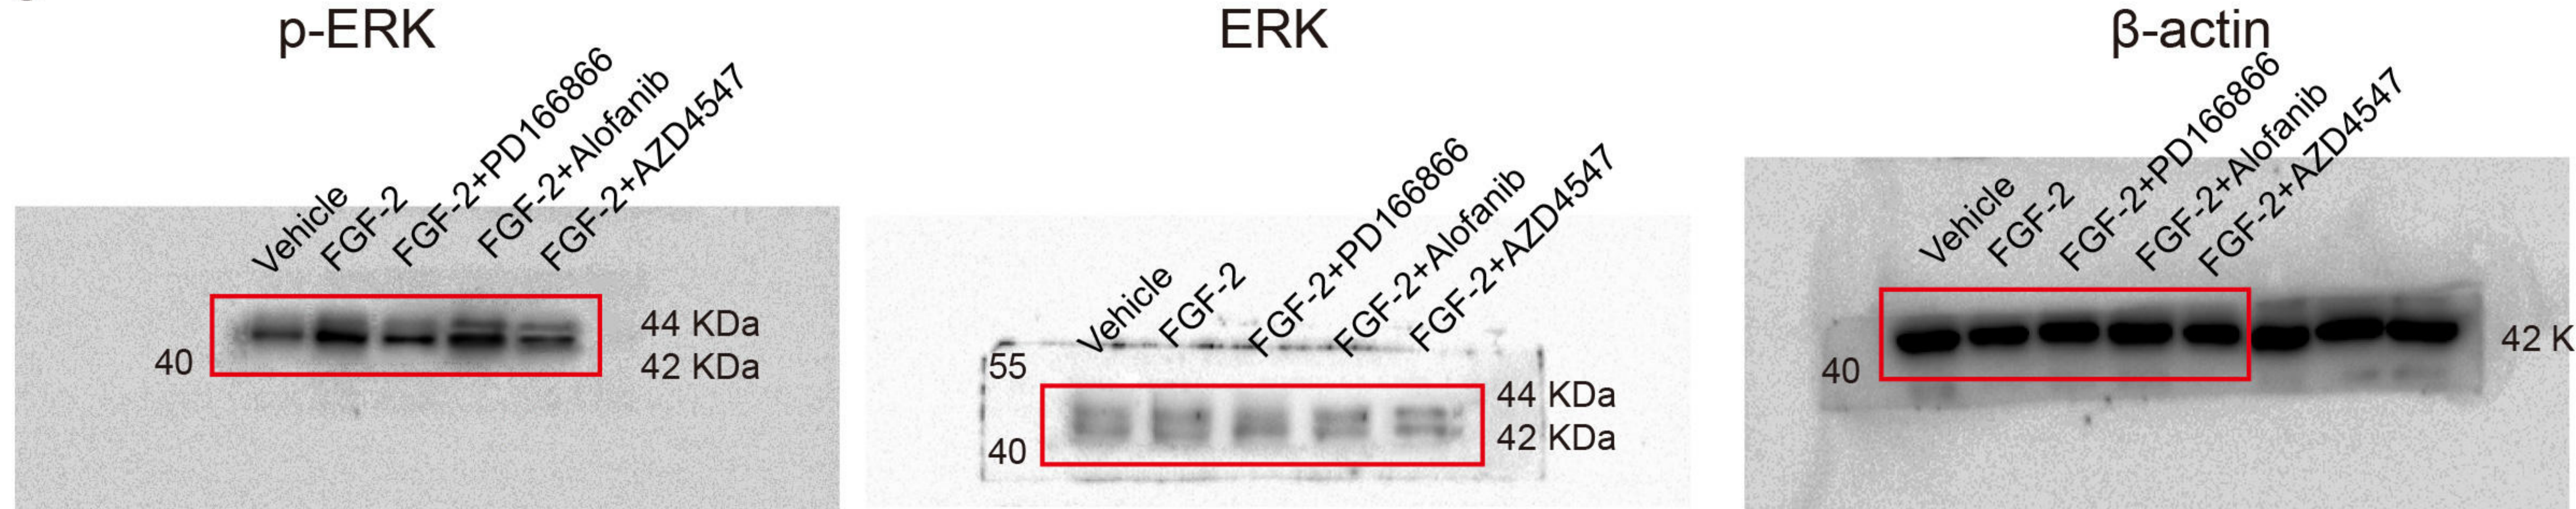

Fig.4J

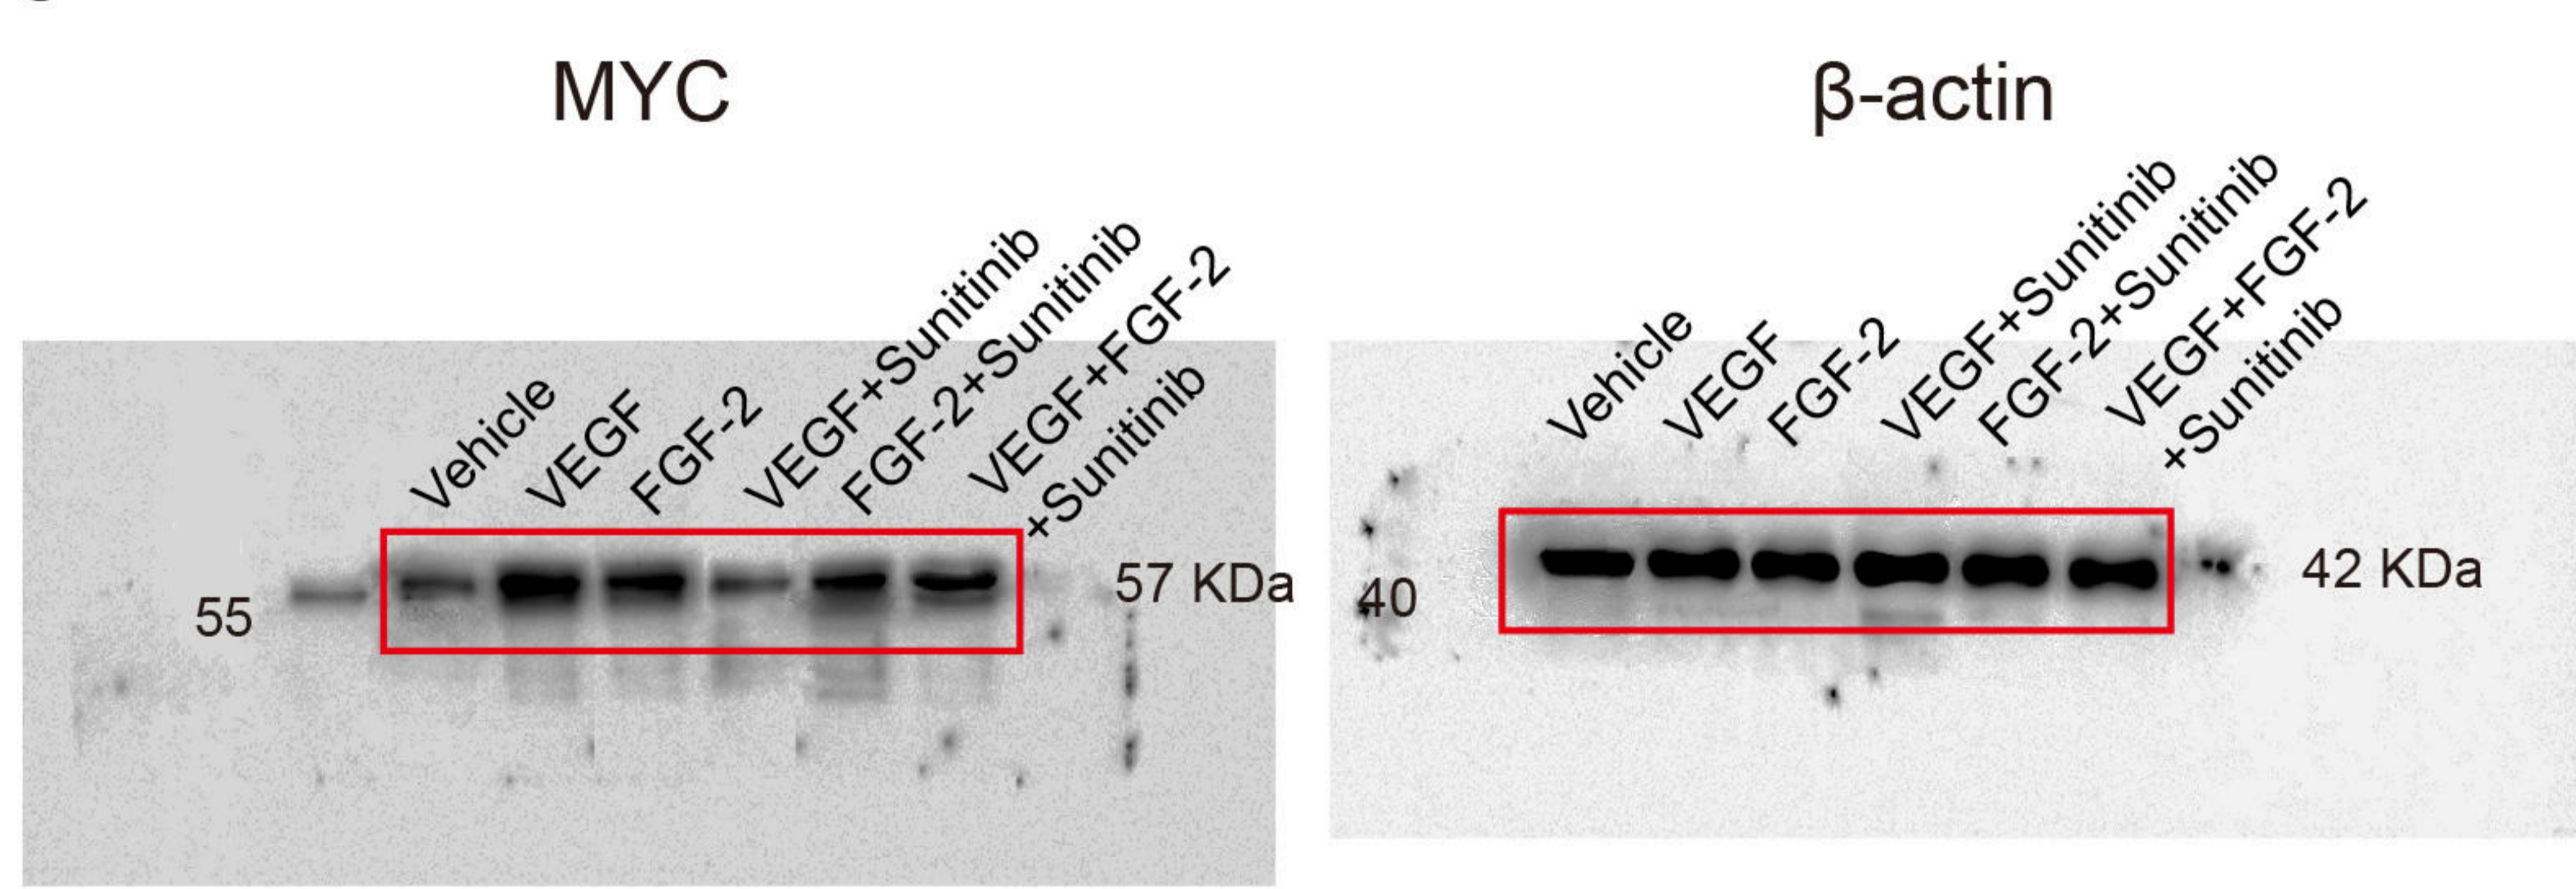

Fig.6I

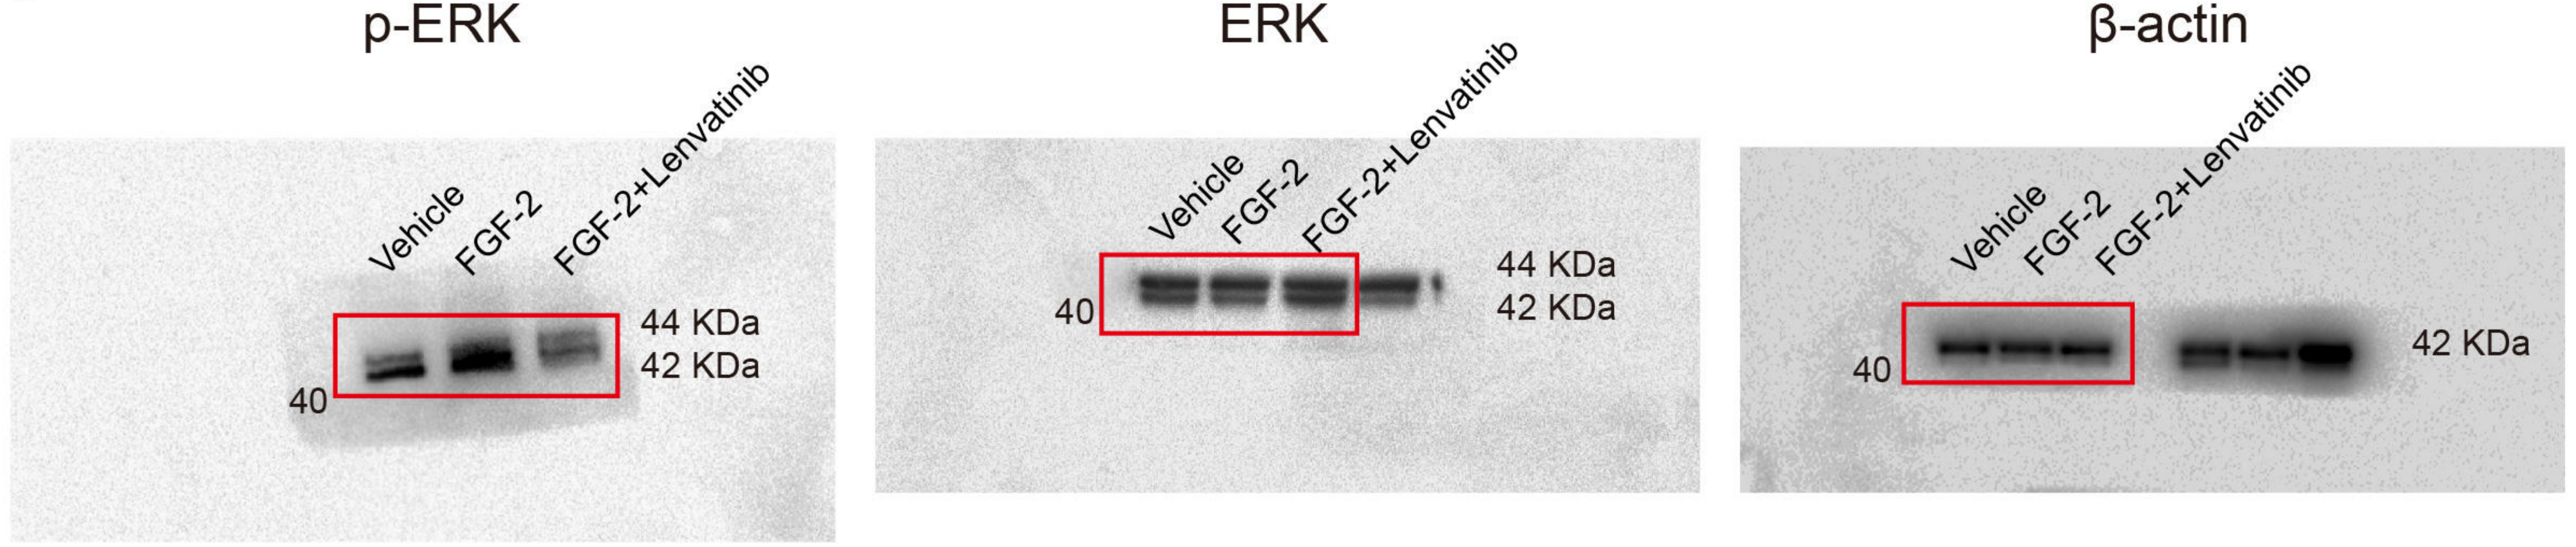

Fig.S4C

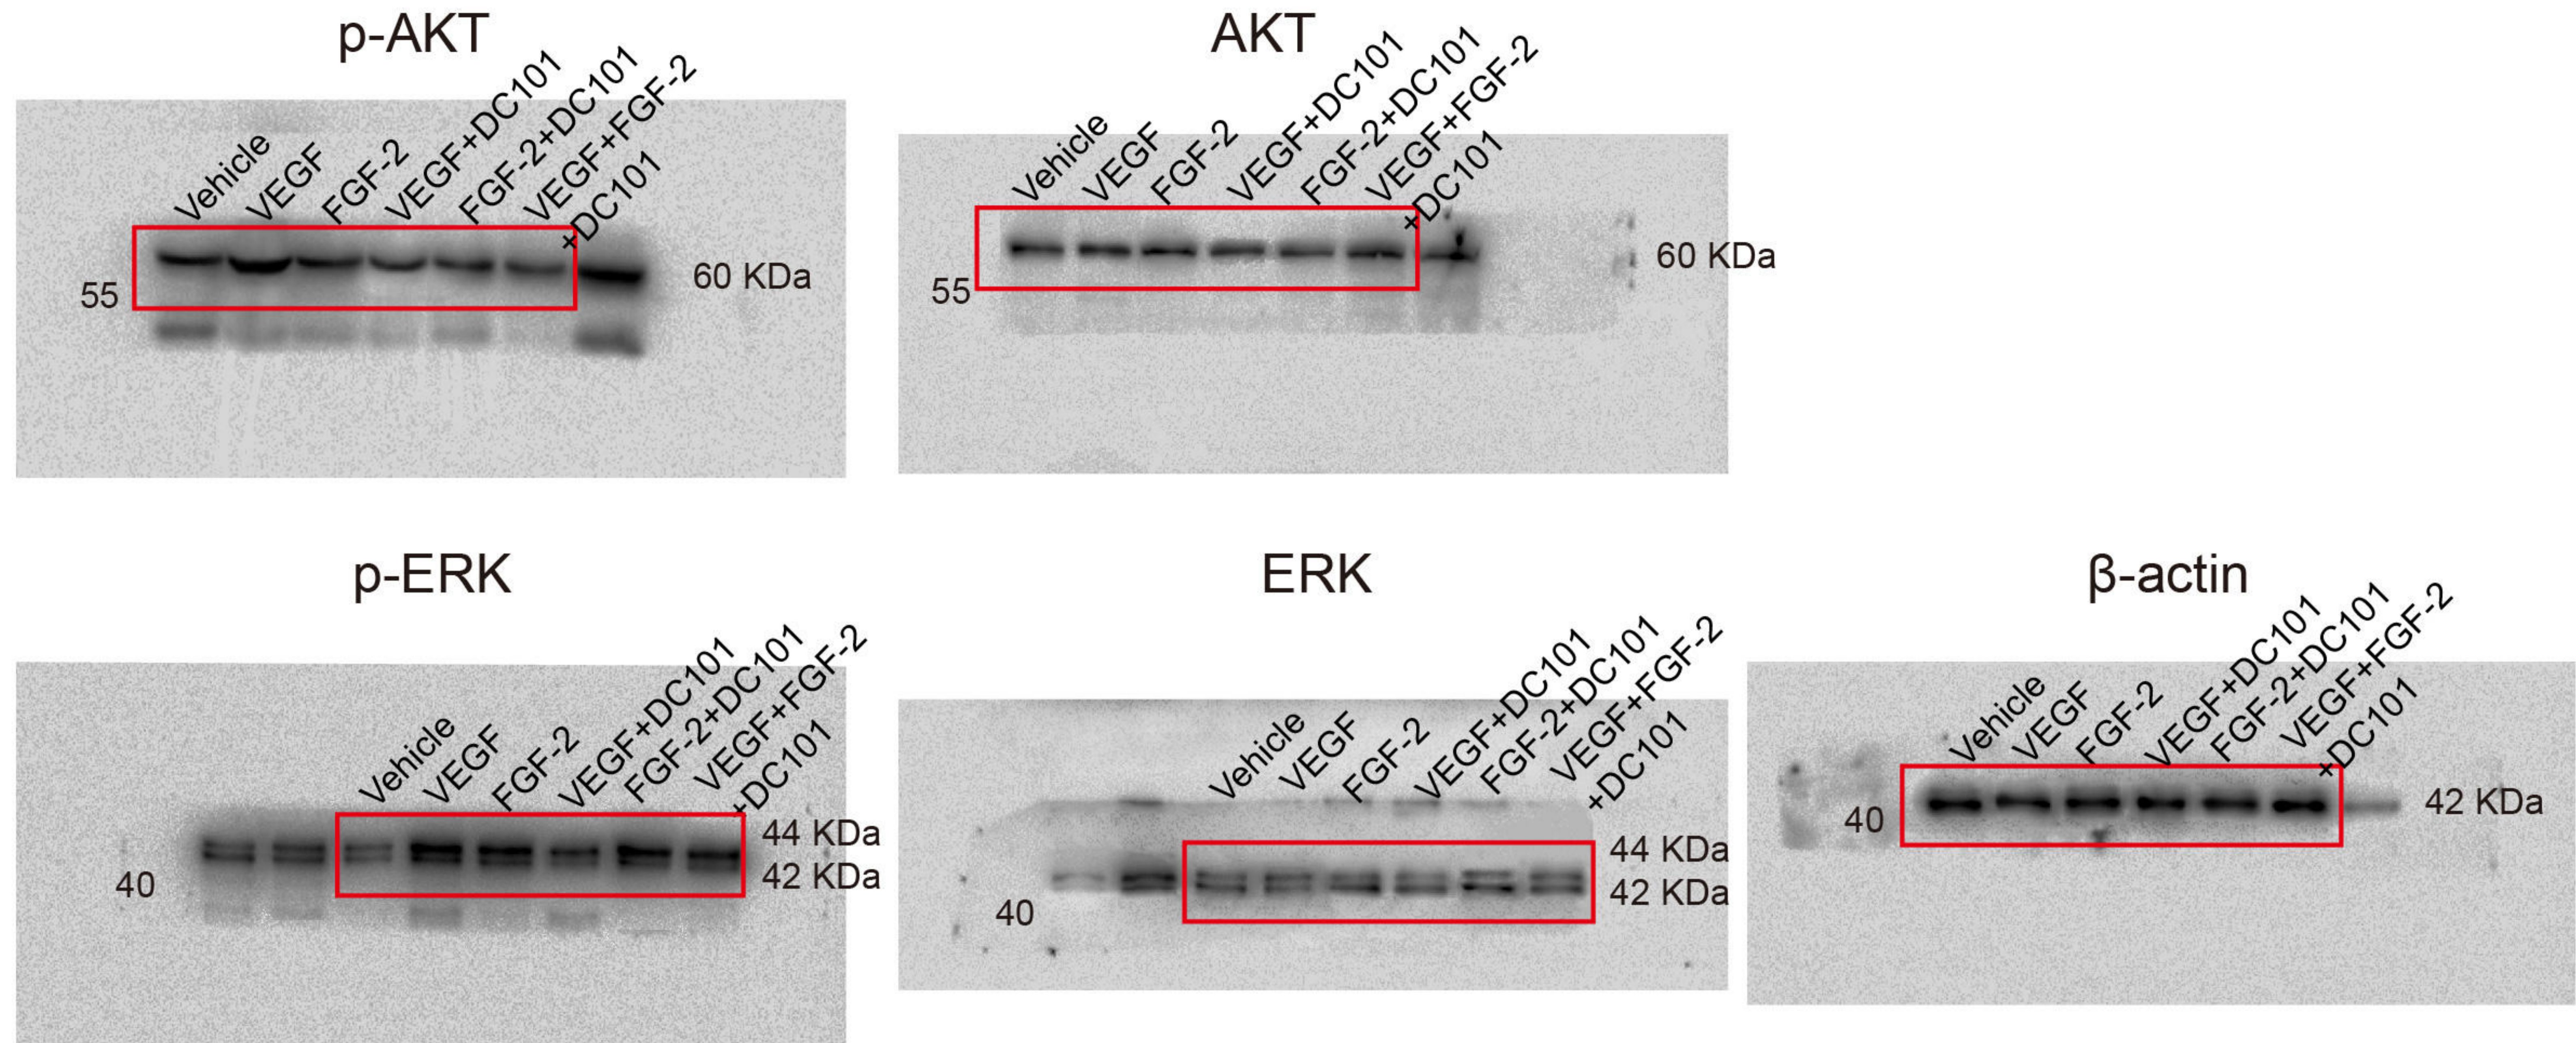

Fig.S4G

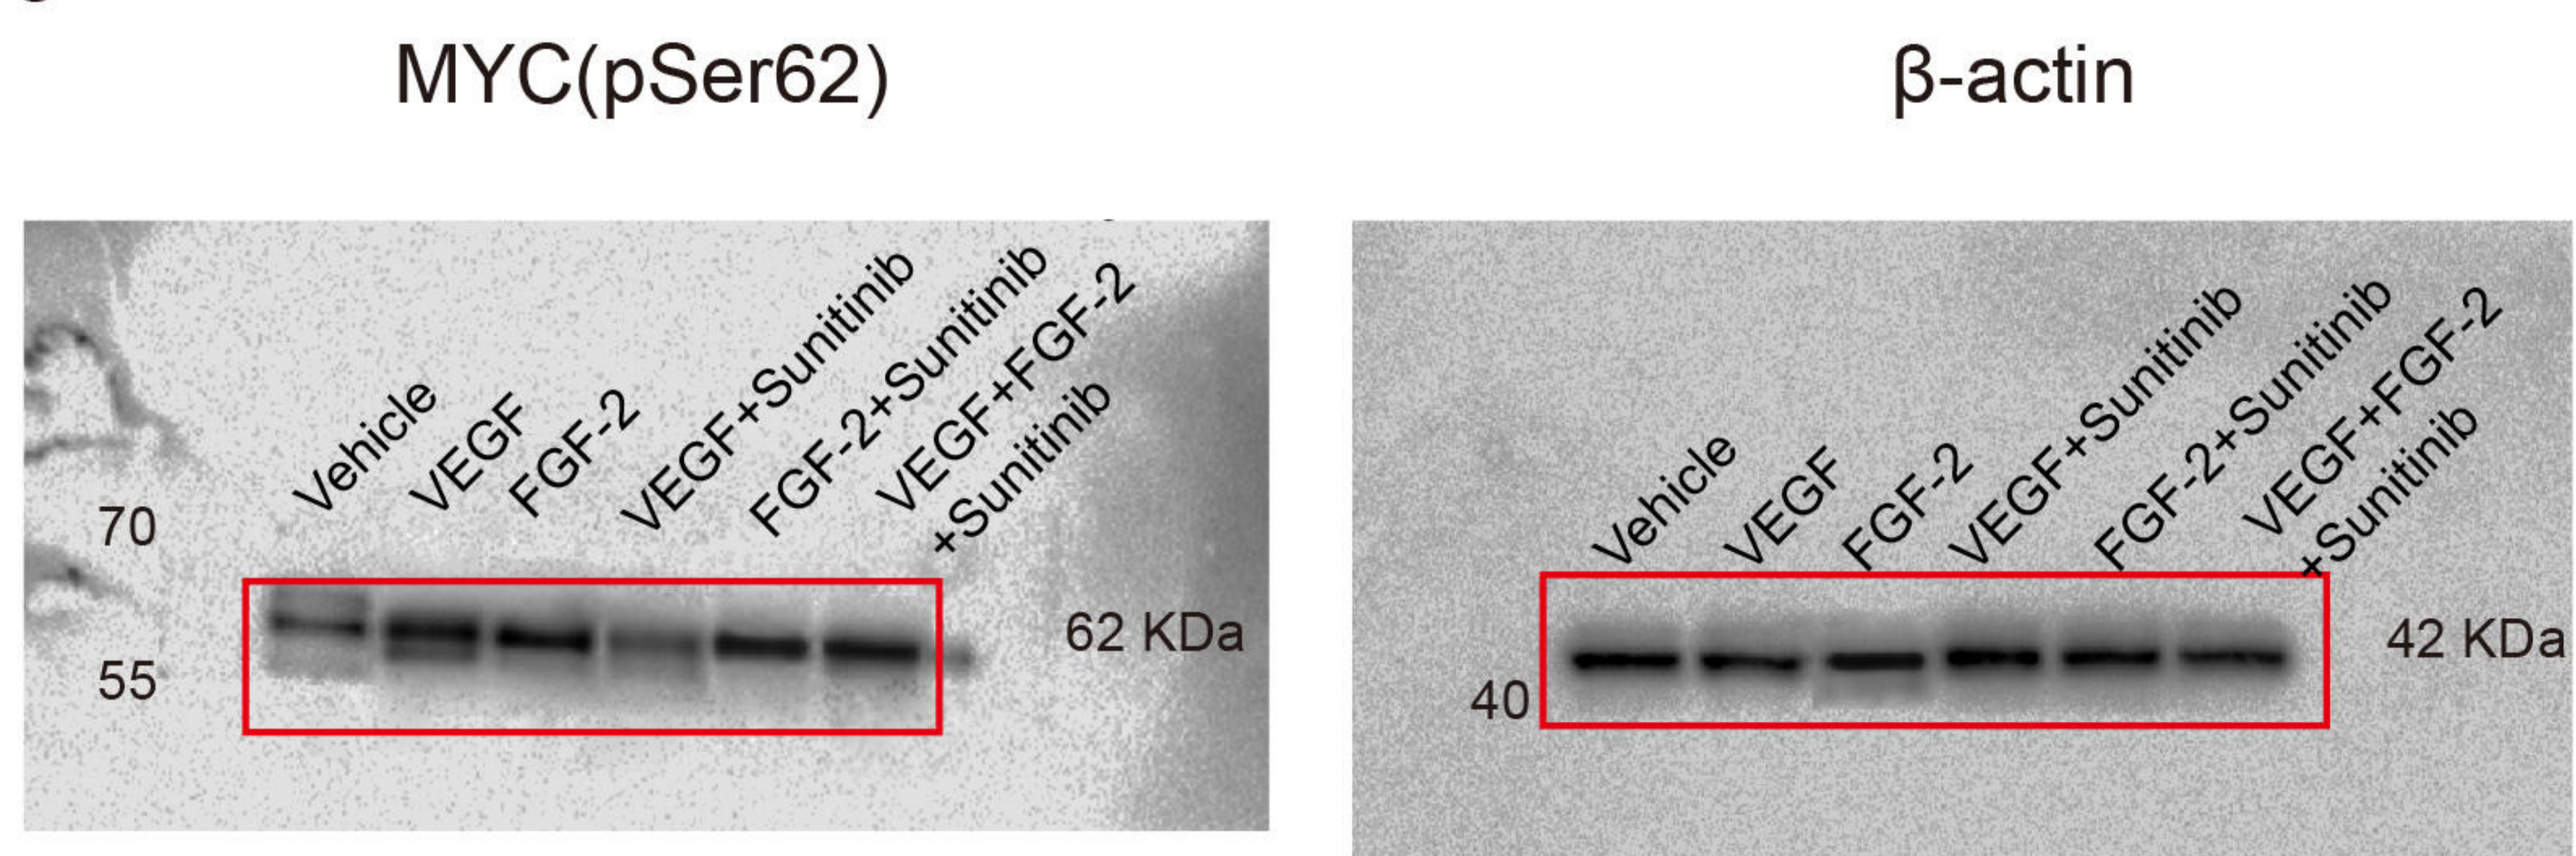

Fig.S4H

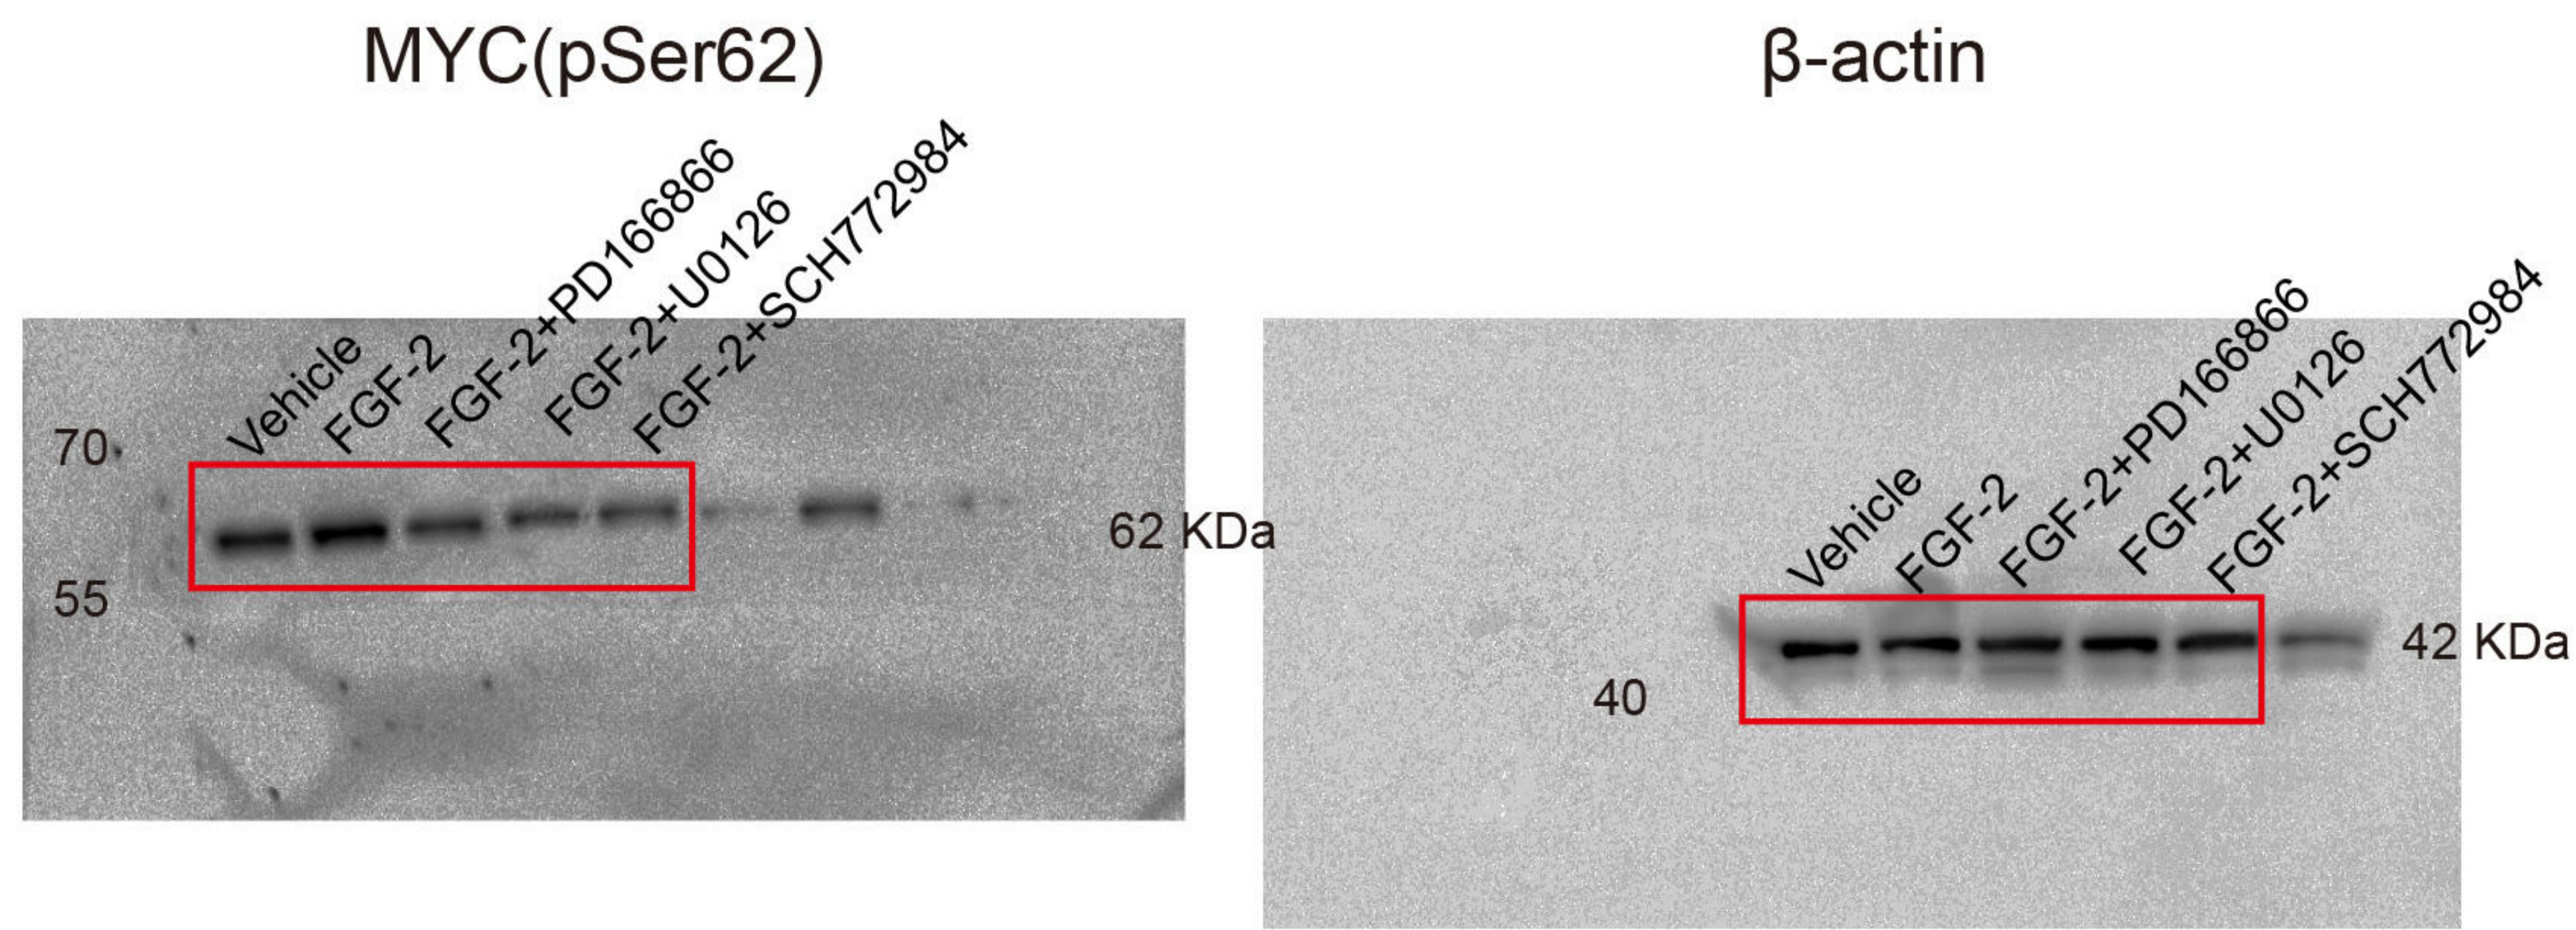

Supplement: 41419_2022_5171_MOESM2_ESM.pdf [file 41419_2022_5171_MOESM2_ESM.pdf]
